# Supplementary material for: Biodegradable Poly(acrylic acid-co-acrylamide)/Poly(vinyl alcohol) Double Network Hydrogels with Tunable Mechanics and High Self-healing Performance
Source: PubMed Central journal article supplement (PMC6631433; doi:10.3390/polym11060952), 2019-06-01
Supplement: polymers-11-00952-s001.pdf [file polymers-11-00952-s001.pdf]

## Supporting Information

**Figure S1** Hysteresis and self-recovery properties of P(AAc-co-AM)/PVA DN hydrogels at room temperature: (a) cyclic tensile loading-unloading curves under different strains at certain resting time (5min) between two successive measurements; (b) cyclic tensile loading-unloading curves under different strains at certain resting time (30min) between two successive measurements

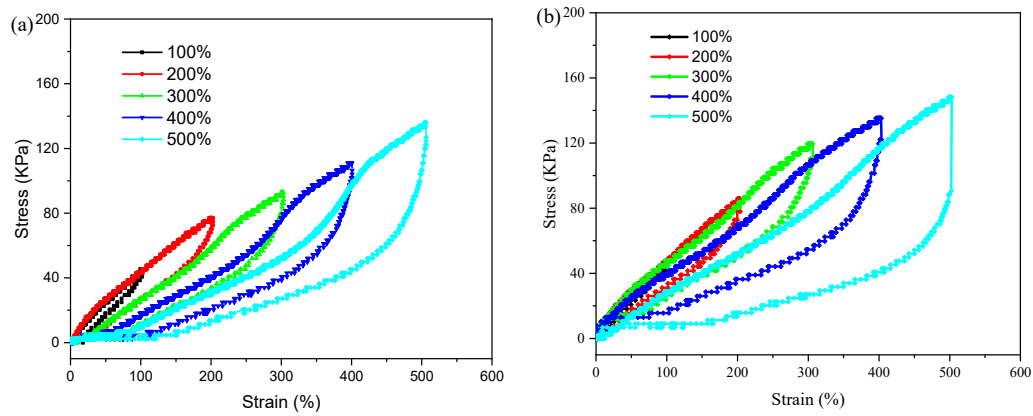

**Figure S1** Hysteresis and self-recovery properties of P(AAc-co-AM)/PVA DN hydrogels at room temperature: (a) cyclic tensile loading-unloading curves under different strains at certain resting time (5min) between two successive measurements; (b) cyclic tensile loading-unloading curves under different strains at certain resting time (30min) between two successive measurements
